Anesthesiology  
1996; 84:1262  
© 1996 American Society of Anesthesiologists, Inc.  
Lippincott-Raven Publishers

## Discrepancy between Thromboelastography and Prothrombin Time

A 57-yr-old man who sustained multiple injuries in a motor vehicle accident required ventilation of his lungs and monitoring of intracranial pressure. Semielective internal fixation of the tibia and reduction of mandibular and zygomatic fractures had been postponed three times because of a prolonged prothrombin time (PT). Partial thromboplastin times, platelet count, indexes of fibrinolysis and factor concentrations (apart from a marginal decrease in factor VII) were normal, there was no evidence of liver disease, and treatment with fresh-frozen plasma (4 units) and vitamin K (10 mg) had not corrected the PT. Hematologic consultation could not explain the prolonged PT, as laboratory error, lupus anticoagulant, and factor VII inhibitors (no correction of the PT with a 1 × 1 mix) had been excluded as potential causes.

Five days after injury and 48 h after the last fresh-frozen plasma administration, we were approached to perform celite thromboelastographs with simultaneously drawn PTs of 16.6 and 17.4 s, respectively (normal range 11.1–13.1 s). Table 1 shows the thromboelastograph indexes with the short R and K times and increased  $\alpha$  angle, indicating no *in vivo* abnormalities of coagulation factor function or platelet-fibrin interaction, and increased maximum amplitude,

Earlier application of the thromboelastograph in this patient with an isolated, unexplained, and clinically misleading PT prolongation would have prevented unnecessary postponement of surgery and may have prevented fresh-frozen plasma and vitamin K administration in the face of clinically normal hemostasis. However, because there was no thromboelastograph trace previous to the fresh-frozen plasma, influence of fresh-frozen plasma on the thromboelastograph cannot be excluded.

**Evan G. Pivalizza, M.B.Ch.B., F.F.A.**

Assistant Professor

**Kimberly L. Henderson, M.D.**

Assistant Professor

**Alanna L. Craig, M.D.**

Resident

Department of Anesthesiology

Department of Anesthesiology,  
University of Texas Medical School

6431 Fannin

Houston, Texas 77030

Electronic mail: epivaliz@anes1.med.uth.tmc.edu

### Table 1. Thromboelastograph Data

|                        | A    | B    | Normal |
|------------------------|------|------|--------|
| R time (s)             | 7.5  | 8.5  | 10-14  |
| K time (s)             | 2.0  | 2.0  | 3-6    |
| Angle (°)              | 78   | 79   | 54-67  |
| Maximum amplitude (mm) | 85.5 | 87.0 | 59-68  |

## References

1. Mallett SV, Cox DJA: Thromboelastography. *Br J Anaesth* 1992; 69:309-13
2. Pivalizza EG, Abramson DC: Thromboelastography as a guide to platelet transfusion (letter). *ANESTHESIOLOGY* 1995; 82:1086

(Accepted for publication February 1, 1996.)

Anesthesiology  
1996; 84:1263-4  
© 1996 American Society  
Lippincott-Raven Publishers

*To the Editor:*—  
et al. of a laynge  
circuit by two rig  
ports.<sup>1</sup> This is a us  
trachea but the t  
gas flow secondar  
in the LMA tube.  
patients when the  
is high. We would  
uation that offers  
gas flow.

The prototype standard LMA with aspect of the main thesiologist adds suggested by Hor the standard dev: choscopy, the fib the additional tu airway intubator, the additional tu main tube.

Gas flow for the #2.5 LMA was set at a tidal volume and the waveform for a 20-kg child ( $1 \cdot \text{min}^{-1}$  and the pressure scope (outer diameter less with the #2.5) presence of a fiber-optic without the fiber-

A dedicated in-  
ing handle und  
solution to the p  
DL-LMA nor the

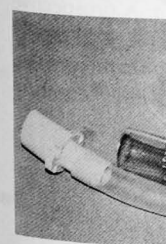

**Fig. 1. The dou**
